# Supplementary material for: SARS-CoV-2 Virus-Like Particle Neutralizing Capacity in Blood Donors Depends on Serological Profile and Donor-Declared SARS-CoV-2 Vaccination History
Source: PubMed Central journal article supplement (PMC8849073; doi:10.1128/spectrum.02262-21), 2022-02-16
Supplement: reviewer-comments.pdf [file reviewer-comments.pdf]

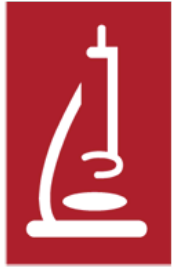

AMERICAN  
SOCIETY FOR  
MICROBIOLOGY

# Microbiology Spectrum

## **SARS-CoV-2 virus-like particle neutralizing capacity in blood donors depends on serological profile and donor declared SARS-CoV-2 vaccination history.**

Steven Drews, Queenie Hu, Reuben Samson, Kento Abe, Bhavisha Rathod, Karen Colwill, Anne-Claude Gingras, Qi-Long Yi, and Sheila O'Brien

*Corresponding Author(s): Steven Drews, Canadian Blood Services*

---

### **Review Timeline:**

|                     |                   |
|---------------------|-------------------|
| Submission Date:    | November 12, 2021 |
| Editorial Decision: | December 18, 2021 |
| Revision Received:  | January 5, 2022   |
| Accepted:           | January 11, 2022  |

---

*Editor: Heba Mostafa*

*Reviewer(s): The reviewers have opted to remain anonymous.*

### **Transaction Report:**

(Note: With the exception of the correction of typographical or spelling errors that could be a source of ambiguity, letters and reports are not edited. The original formatting of letters and referee reports may not be reflected in this compilation.)

**DOI: <https://doi.org/10.1128/spectrum.02262-21>**

December 18, 2021

Dr. Steven J Drews  
Canadian Blood Services  
8249 114 St NW  
Edmonton, Alberta T6G 2R8  
Canada

Re: Spectrum02262-21 (SARS-CoV-2 virus-like particle neutralizing capacity in blood donors depends on serological profile and donor declared SARS-CoV-2 vaccination history.)

Dear Dr. Steven J Drews:

Thank you for submitting your manuscript to Microbiology Spectrum. When submitting the revised version of your paper, please provide (1) point-by-point responses to the issues raised by the reviewers as file type "Response to Reviewers," not in your cover letter, and (2) a PDF file that indicates the changes from the original submission (by highlighting or underlining the changes) as file type "Marked Up Manuscript - For Review Only". Please use this link to submit your revised manuscript - we strongly recommend that you submit your paper within the next 60 days or reach out to me. Detailed instructions on submitting your revised paper are below.

Link Not Available

Thank you for the privilege of reviewing your work. Below you will find instructions from the Microbiology Spectrum editorial office and comments generated during the review.

The ASM Journals program strives for constant improvement in our submission and publication process. Please tell us how we can improve your experience by taking this quick [Author Survey](#).

Sincerely,

Heba Mostafa

Editor, Microbiology Spectrum

Journals Department  
American Society for Microbiology  
1752 N St., NW  
Washington, DC 20036  
E-mail: [spectrum@asmusa.org](mailto:spectrum@asmusa.org)

Reviewer comments:

Reviewer #1 (Comments for the Author):

The authors describe a serosurvey by the Canadian blood services looking at the ability of seropositive samples to neutralize different SARS-CoV-2 lineages. This study was done in a time where vaccination rates were low in Canada, and the results are valuable for investigating the use of sera as possible therapeutics. The study was carefully crafted and the limitations clearly noted. No major issues were found. The only minor concern is the length of the manuscript, which slightly exceeds the word limit for the journal. Given the complexity of the data, I would advocate for an exception. Formatting can be addressed if the manuscript moves forward, and I would also suggest putting tables into the supplemental material to focus on the Figure which summarize the data.

Reviewer #2 (Comments for the Author):

This study analyzed 4500 Canadian blood donors with a known vaccination status during the first 3 months of 2021 at the

beginning of vaccination rollout for presence of anti-SarsCov2 antibodies with anti-N, anti-S and anti-RBD reactivity. A few samples were then characterized for the ability to neutralize Sars-Cov2 wild-type and variant of concern strains. Vaccinated donors showed elevated Sars-Cov2 antibodies titers with strong neutralizing capacity against wild-type and variants (slightly reduced against the beta variant). Interestingly, at the time of sample collection, half of the unvaccinated donors had anti-Sars-Cov2 antibodies with acceptable neutralizing capacity.

While it provides useful information, the manuscript is difficult to read. All sections are long and detailed, and should be more concise highlighting the important findings. Some efforts should be put on data presentation and description of the results. Particularly, the same data are presented several times in different ways (Figures, Table, Heatmap) and according to various statistical comparisons. The authors should simplify selecting for example one mean of presentation. The discussion brings a good perspective but can be shortened. The limitations of the study are well explained. The main conclusions of the study should be highlighted, especially in the abstract.

Important comments:

1. The results section can be improved, especially when describing Fig. 4 and 5. The same phrases ("neutralization was elevated/reduced...", ...) are repeated many times. The authors should describe their findings in a more concise manner.
2. Tables 4 and 5 present the same data (untransformed and transformed). Only one should be shown. Similarly, the summary data tables (Table 5 and 6) are unnecessary as the data are already shown in Fig. 4, 5, 6. The heatmap is also a different way to present the same data and does not add information to the manuscript. Those additional supportive figure/table(s) can be added to Supplemental Information.
3. It is not clear why the authors chose multiple different statistical test to describe similar data. For example, the data in Fig. 4 and 5 are the same but presented in a different order and the authors used Friedman (Fig. 4) and Kruskal-Wallis (Fig. 5). A few lines giving a rationale of the choice of the statistical test should be explicit?

Other specific comments:

4. The age data corresponding to L155-157 (median, range) should be added in Table 1.
5. The authors should show the cut-off directly on the graphs in Fig. 2 and 3 (dashed line) to make it easier to read.
6. The graph in Panel D in Fig. 4 is empty and cannot be displayed this way, at least not without a positive result on the graph. This result is also shown in a table and in the next figure, and those can be referred to.
7. L173-178: to which figure/table do those lines refer to?
8. Please add a paragraph in the method section describing cell origin and culture conditions?
9. L421-425 and L433-435 in the method section are duplicated and one should be removed.
10. Fig. 6 needs a better resolution or resizing.
11. Please double check the text for typos/errors/punctuations.
12. Please also check that the references are complete and without unnecessary information.

Staff Comments:

### Preparing Revision Guidelines

To submit your modified manuscript, log onto the eJP submission site at <https://spectrum.msubmit.net/cgi-bin/main.plex>. Go to Author Tasks and click the appropriate manuscript title to begin the revision process. The information that you entered when you first submitted the paper will be displayed. Please update the information as necessary. Here are a few examples of required updates that authors must address:

- Point-by-point responses to the issues raised by the reviewers in a file named "Response to Reviewers," NOT IN YOUR COVER LETTER.
- Upload a compare copy of the manuscript (without figures) as a "Marked-Up Manuscript" file.
- Each figure must be uploaded as a separate file, and any multipanel figures must be assembled into one file.
- Manuscript: A .DOC version of the revised manuscript
- Figures: Editable, high-resolution, individual figure files are required at revision, TIFF or EPS files are preferred

For complete guidelines on revision requirements, please see the journal Submission and Review Process requirements at <https://journals.asm.org/journal/Spectrum/submission-review-process>. **Submissions of a paper that does not conform to Microbiology Spectrum guidelines will delay acceptance of your manuscript. "**

Please return the manuscript within 60 days; if you cannot complete the modification within this time period, please contact me. If you do not wish to modify the manuscript and prefer to submit it to another journal, please notify me of your decision immediately so that the manuscript may be formally withdrawn from consideration by Microbiology Spectrum.

If your manuscript is accepted for publication, you will be contacted separately about payment when the proofs are issued; please follow the instructions in that e-mail. Arrangements for payment must be made before your article is published. For a complete list of **Publication Fees**, including supplemental material costs, please visit our [website](#).

Corresponding authors may [join or renew ASM membership](#) to obtain discounts on publication fees. Need to upgrade your membership level? Please contact Customer Service at [Service@asmusa.org](mailto:Service@asmusa.org).

Thank you for submitting your paper to Microbiology Spectrum.

To the Editor,  
Microbiology Spectrum

Re: Spectrum02262-21 (SARS-CoV-2 virus-like particle neutralizing capacity in blood donors depends on serological profile and donor declared SARS-CoV-2 vaccination history.)

Thank you for reviewing our manuscript. We have responded to reviewer comments below using a point-by-point approach. Edits in the manuscript are marked up in the text.

Reviewer #1 (Comments for the Author):

The authors describe a serosurvey by the Canadian blood services looking at the ability of seropositive samples to neutralize different SARS-CoV-2 lineages. This study was done in a time where vaccination rates were low in Canada, and the results are valuable for investigating the use of sera as possible therapeutics. The study was carefully crafted and the limitations clearly noted. No major issues were found. The only minor concern is the length of the manuscript, which slightly exceeds the word limit for the journal. Given the complexity of the data, I would advocate for an exception. Formatting can be addressed if the manuscript moves forward, and I would also suggest putting tables into the supplemental material to focus on the Figure which summarize the data.

*Thank you for the comments, we have addressed the length issue by primarily responding to Reviewer #2. In general, we made the results section more concise and have moved some figures and tables to supplemental files. Other redundant data has been removed.*

Reviewer #2 (Comments for the Author):

While it provides useful information, the manuscript is difficult to read. All sections are long and detailed, and should be more concise highlighting the important findings. Some efforts should be put on data presentation and description of the results. Particularly, the same data are presented several times in different ways (Figures, Table, Heatmap) and according to various statistical comparisons. The authors should simplify selecting for example one mean of presentation. The discussion brings a good perspective but can be shortened. The limitations of the study are well explained. The main conclusions of the study should be highlighted, especially in the abstract.

*Thank you for the comments, we have addressed the length issue by reducing text and moving some figures and tables to supplemental files. Some redundant data has been removed from the text.*

Important comments:

1. The results section can be improved, especially when describing Fig. 4 and 5. The same phrases ("neutralization was elevated/reduced...", ...) are repeated many times. The authors should describe their findings in a more concise manner.

*We have reduced the text and made it more concise.*

2. Tables 4 and 5 present the same data (untransformed and transformed). Only one should be shown.

Similarly, the summary data tables (Table 5 and 6) are unnecessary as the data are already shown in Fig. 4, 5, 6.

*We have moved Tables 4,5 and 6 to supplementary files.*

The heatmap is also a different way to present the same data and does not add information to the manuscript.

*We have deleted the heat map.*

Those additional supportive figure/table(s) can be added to Supplemental Information.

3. It is not clear why the authors chose multiple different statistical test to describe similar data. For example, the data in Fig. 4 and 5 are the same but presented in a different order and the authors used Friedman (Fig. 4) and Kruskal-Wallis (Fig. 5). A few lines giving a rationale of the choice of the statistical test should be explicit?

*Friedman statistics were used when there was analysis of repeated measures within a group. For example when comparing Wild type, Alpha, Beta, Gamma and Delta VLP neutralization within a group of plasma (e.g. "vaccinated and anti-N"). Kruskal-Wallis statistics were used when repeated measures were not used and different groups (e.g. tested "vaccinated and anti-N" vs "vaccinated and no anti-N" vs "not vaccinated and anti-N" vs "not-vaccinated and no anti-N" plasma" were compared for neutralization against specific VLPs (e.g. Alpha).*

*Our primary description of the data will be with Figure 4. Figures 5 and 6 will be moved to supplemental files*

Other specific comments:

4. The age data corresponding to L155-157 (median, range) should be added in Table 1.  
*Age data was added to Table 1.*

5. The authors should show the cut-off directly on the graphs in Fig. 2 and 3 (dashed line) to make it easier to read.

*Cut-offs for each of the assays were drawn onto and Fig. 2 and Fig.3.*

6. The graph in Panel D in Fig. 4 is empty and cannot be displayed this way, at least not without a positive result on the graph. This result is also shown in a table and in the next figure, and those can be referred to.

*Panel D had been removed from Figure 4.*

7. L173-178: to which figure/table do those lines refer to?

*We have deleted this text as it is redundant to later text.*

8. Please add a paragraph in the method section describing cell origin and culture conditions?

*We have added information in a restructured text.*

9. L421-425 and L433-435 in the method section are duplicated and one should be removed.

*The duplication was removed.*

10. Fig. 6 needs a better resolution or resizing.

*We have removed Fig. 6 as it was redundant.*

11. Please double check the text for typos/errors/punctuations.

*We have analyzed our manuscript text for conciseness, spelling, grammar, clarity, conciseness and formality using the Word "editor." We have made changes where appropriate.*

12. Please also check that the references are complete and without unnecessary information.

*We have reviewed references and added doi and web links where full publication information is not yet available on Pubmed.*

Regards

Steven J. Drews PhD FCCM D(ABMM)

Canadian Blood Services, 8249 114 St NW

Edmonton, AB T6G 2R8, email: [steven.drews@blood.ca](mailto:steven.drews@blood.ca), phone: 780-702-8639

January 11, 2022

Dr. Steven J Drews  
Canadian Blood Services  
8249 114 St NW  
Edmonton, Alberta T6G 2R8  
Canada

Re: Spectrum02262-21R1 (SARS-CoV-2 virus-like particle neutralizing capacity in blood donors depends on serological profile and donor declared SARS-CoV-2 vaccination history.)

Dear Dr. Steven J Drews:

Your manuscript has been accepted, and I am forwarding it to the ASM Journals Department for publication. You will be notified when your proofs are ready to be viewed.

The ASM Journals program strives for constant improvement in our submission and publication process. Please tell us how we can improve your experience by taking this quick [Author Survey](#).

As an open-access publication, Spectrum receives no financial support from paid subscriptions and depends on authors' prompt payment of publication fees as soon as their articles are accepted. You will be contacted separately about payment when the proofs are issued; please follow the instructions in that e-mail. Arrangements for payment must be made before your article is published. For a complete list of **Publication Fees**, including supplemental material costs, please visit our [website](#).

Corresponding authors may [join or renew ASM membership](#) to obtain discounts on publication fees. Need to upgrade your membership level? Please contact Customer Service at [Service@asmusa.org](mailto:Service@asmusa.org).

Thank you for submitting your paper to Spectrum.

Sincerely,

Heba Mostafa  
Editor, Microbiology Spectrum

Journals Department  
American Society for Microbiology  
1752 N St., NW  
Washington, DC 20036  
E-mail: [spectrum@asmusa.org](mailto:spectrum@asmusa.org)

Supplemental Material: Accept
