# Supplementary material for: SARS-CoV-2 Virus-Like Particle Neutralizing Capacity in Blood Donors Depends on Serological Profile and Donor-Declared SARS-CoV-2 Vaccination History
Source: PubMed Central journal article supplement (PMC8849073; doi:10.1128/spectrum.02262-21), 2022-02-16
Supplement: spectrum02262-21_supp_1_seq8.pdf [file spectrum02262-21_supp_1_seq8.pdf]

## SUPPLEMENTAL DATA

**TABLE S1.** Summary of VLP neutralization data expressed as  $\log_2(\text{ID}_{50})$  classified into vaccinated and unvaccinated donor groups (January-March 2021).

| Classification           | Specimen # | Wild type | Alpha | Beta  | Gamma | Delta |
|--------------------------|------------|-----------|-------|-------|-------|-------|
| Vaccinated and anti-N    | CIHR013654 | 7.24      | 5.07  | 0     | 0     | 3.44  |
|                          | CIHR015946 | 5.31      | 0     | 0     | 0     | 0     |
|                          | CIHR016894 | 15.81     | 14.64 | 13.55 | 14.70 | 14.88 |
|                          | CIHR017333 | 12.12     | 11.21 | 8.13  | 10.73 | 11.54 |
|                          | CIHR017730 | 13.98     | 12.83 | 11.96 | 12.39 | 12.61 |
| Vaccinated and no anti-N | CIHR013818 | 11.06     | 10.59 | 0     | 0     | 11.37 |
|                          | CIHR014329 | 7.94      | 6.80  | 4.78  | 6.52  | 7.80  |
|                          | CIHR015234 | 6.75      | 0     | 0     | 0     | 0     |
|                          | CIHR015533 | 14.16     | 12.65 | 9.41  | 11.63 | 12.33 |
|                          | CIHR015657 | 8.63      | 6.79  | 5.28  | 6.96  | 7.23  |
|                          | CIHR015884 | 10.95     | 9.48  | 7.70  | 9.96  | 10.32 |
|                          | CIHR015958 | 10.13     | 7.53  | 0     | 6.30  | 7.57  |
|                          | CIHR016698 | 10.53     | 9.98  | 6.94  | 9.61  | 9.46  |
|                          | CIHR016904 | 6.35      | 4.44  | 0     | 0     | 5.75  |
|                          | CIHR016905 | 12.20     | 11.24 | 8.96  | 9.95  | 11.22 |
|                          | CIHR016930 | 0         | 0     | 0     | 0     | 0     |
|                          | CIHR017087 | 8.49      | 6.90  | 6.27  | 8.29  | 8.66  |
|                          | CIHR017189 | 10.21     | 8.73  | 6.52  | 9.30  | 9.00  |
|                          | CIHR017229 | 0         | 0     | 0     | 0     | 0     |
|                          | CIHR017534 | 5.79      | 5.61  | 0     | 0     | 0     |
|                          | CIHR017540 | 9.39      | 7.14  | 0.000 | 6.67  | 6.22  |
|                          | CIHR017728 | 13.47     | 12.21 | 9.71  | 11.21 | 11.38 |
|                          | CIHR017824 | 10.45     | 8.75  | 8.05  | 9.35  | 8.27  |
|                          | CIHR017838 | 13.19     | 11.45 | 9.28  | 10.83 | 10.98 |
|                          | CIHR018126 | 9.64      | 9.13  | 6.85  | 9.01  | 8.27  |
| Unvaccinated and anti-N  | CIHR013757 | 0         | 0     | 0     | 0     | 0     |

|                            |            |       |       |       |       |
|----------------------------|------------|-------|-------|-------|-------|
| CIHR013936                 | 8.94       | 7.60  | 6.34  | 7.17  | 7.28  |
| CIHR014110                 | 9.46       | 6.97  | 7.84  | 8.62  | 6.96  |
| CIHR014113                 | 10.31      | 7.02  | 5.66  | 8.24  | 7.14  |
| CIHR014235                 | 9.98       | 8.55  | 5.22  | 5.96  | 9.90  |
| CIHR014309                 | 8.40       | 7.01  | 5.66  | 7.55  | 7.02  |
| CIHR014834                 | 6.05       | 5.37  | 0     | 0     | 5.29  |
| CIHR014840                 | 7.53       | 6.57  | 4.54  | 5.45  | 5.76  |
| CIHR014884                 | 9.14       | 6.92  | 4.96  | 8.36  | 6.93  |
| CIHR014993                 | 0          | 0     | 0     | 0     | 0     |
| CIHR015094                 | 11.02      | 10.13 | 11.82 | 10.52 | 12.11 |
| CIHR015434                 | 8.08       | 6.78  | 5.66  | 7.25  | 7.15  |
| CIHR016024                 | 8.07       | 8.41  | 0     | 5.17  | 8.73  |
| CIHR016624                 | 6.19       | 5.71  | 4.68  | 5.53  | 6.39  |
| CIHR016979                 | 8.13       | 7.81  | 0     | 8.85  | 10.12 |
| CIHR017127                 | 6.19       | 5.13  | 0     | 2.97  | 0.00  |
| CIHR017305                 | 8.00       | 7.14  | 5.22  | 7.20  | 7.17  |
| CIHR017724                 | 11.33      | 10.29 | 8.52  | 9.57  | 9.12  |
| CIHR017894                 | 6.46       | 6.33  | 5.29  | 5.80  | 5.40  |
| CIHR017990                 | 8.55       | 7.19  | 5.36  | 6.88  | 6.01  |
| Unvaccinated and no anti-N | CIHR014238 | 0     | 0     | 0     | 0     |
|                            | CIHR014491 | 0     | 0     | 0     | 0     |
|                            | CIHR014632 | 0     | 0     | 0     | 0     |
|                            | CIHR014664 | 0     | 0     | 0     | 0     |
|                            | CIHR014926 | 0     | 0     | 0     | 0     |
|                            | CIHR015079 | 0     | 0     | 0     | 0     |
|                            | CIHR015475 | 0     | 0     | 0     | 0     |
|                            | CIHR015843 | 0     | 0     | 0     | 0     |
|                            | CIHR015948 | 0     | 0     | 0     | 0     |
|                            | CIHR016403 | 0     | 0     | 0     | 0     |
|                            | CIHR016447 | 0     | 0     | 0     | 0     |
|                            | CIHR016548 | 0     | 0     | 0     | 0     |

|  |            |   |   |   |   |   |
|--|------------|---|---|---|---|---|
|  | CIHR016557 | 0 | 0 | 0 | 0 | 0 |
|  | CIHR016973 | 0 | 0 | 0 | 0 | 0 |
|  | CIHR017530 | 0 | 0 | 0 | 0 | 0 |
|  | CIHR017945 | 0 | 0 | 0 | 0 | 0 |
|  | CIHR018000 | 0 | 0 | 0 | 0 | 0 |
|  | CIHR018002 | 0 | 0 | 0 | 0 | 0 |
|  | CIHR018166 | 0 | 0 | 0 | 0 | 0 |
|  | CIHR018178 | 0 | 0 | 0 | 0 | 0 |

**TABLE S2** A descriptive summary of transformed VLP neutralization data ( $\log_2[\text{ID}_{50}]$ ) based on donor vaccine history and plasma anti-N positivity

| Category                   |                                         | Wild type | Alpha | Beta | Gamma | Delta |
|----------------------------|-----------------------------------------|-----------|-------|------|-------|-------|
| Vaccinated and anti-N      | Number of values                        | 5         | 5     | 5    | 5     | 5     |
|                            | Minimum $\log_2(\text{ID}_{50})$        | 5.3       | 0     | 0    | 0     | 0     |
|                            | 25% Percentile $\log_2(\text{ID}_{50})$ | 6.3       | 2.5   | 0    | 0     | 1.7   |
|                            | Median $\log_2(\text{ID}_{50})$         | 12.1      | 11.2  | 8.1  | 10.7  | 11.5  |
|                            | 75% Percentile $\log_2(\text{ID}_{50})$ | 14.9      | 13.7  | 12.8 | 13.5  | 13.7  |
|                            | Maximum $\log_2(\text{ID}_{50})$        | 15.8      | 14.6  | 13.6 | 14.7  | 14.9  |
|                            | Range $\log_2(\text{ID}_{50})$          | 10.5      | 14.6  | 13.6 | 14.7  | 14.9  |
| Vaccinated and no anti-N   | Number of values                        | 20        | 20    | 20   | 20    | 20    |
|                            | Minimum $\log_2(\text{ID}_{50})$        | 0         | 0     | 0    | 0     | 0     |
|                            | 25% Percentile $\log_2(\text{ID}_{50})$ | 7.0       | 5.9   | 0    | 0     | 5.87  |
|                            | Median $\log_2(\text{ID}_{50})$         | 9.9       | 8.1   | 5.8  | 7.6   | 8.3   |
|                            | 75% Percentile $\log_2(\text{ID}_{50})$ | 11.0      | 10.4  | 8.0  | 9.9   | 10.8  |
|                            | Maximum $\log_2(\text{ID}_{50})$        | 14.2      | 12.7  | 9.7  | 11.6  | 12.3  |
|                            | Range $\log_2(\text{ID}_{50})$          | 14.2      | 12.7  | 9.7  | 11.6  | 12.3  |
| Unvaccinated and anti-N    | Number of values                        | 20        | 20    | 20   | 20    | 20    |
|                            | Minimum $\log_2(\text{ID}_{50})$        | 0         | 0     | 0    | 0     | 0     |
|                            | 25% Percentile $\log_2(\text{ID}_{50})$ | 6.3       | 5.9   | 0    | 5.2   | 5.5   |
|                            | Median $\log_2(\text{ID}_{50})$         | 8.1       | 7.0   | 5.2  | 7.0   | 7.0   |
|                            | 75% Percentile $\log_2(\text{ID}_{50})$ | 9.4       | 7.8   | 5.7  | 8.3   | 8.4   |
|                            | Maximum $\log_2(\text{ID}_{50})$        | 11.3      | 10.3  | 11.8 | 10.5  | 12.1  |
|                            | Range $\log_2(\text{ID}_{50})$          | 11.3      | 10.3  | 11.8 | 10.5  | 12.1  |
| Unvaccinated and no anti-N | Number of values                        | 20        | 20    | 20   | 20    | 20    |
|                            | Minimum $\log_2(\text{ID}_{50})$        | 0         | 0     | 0    | 0     | 0     |
|                            | 25% Percentile $\log_2(\text{ID}_{50})$ | 0         | 0     | 0    | 0     | 0     |
|                            | Median $\log_2(\text{ID}_{50})$         | 0         | 0     | 0    | 0     | 0     |
|                            | 75% Percentile $\log_2(\text{ID}_{50})$ | 0         | 0     | 0    | 0     | 0     |

|  |                                  |   |   |   |   |   |
|--|----------------------------------|---|---|---|---|---|
|  | Maximum $\log_2(\text{ID}_{50})$ | 0 | 0 | 0 | 0 | 0 |
|  | Range $\log_2(\text{ID}_{50})$   | 0 | 0 | 0 | 0 | 0 |

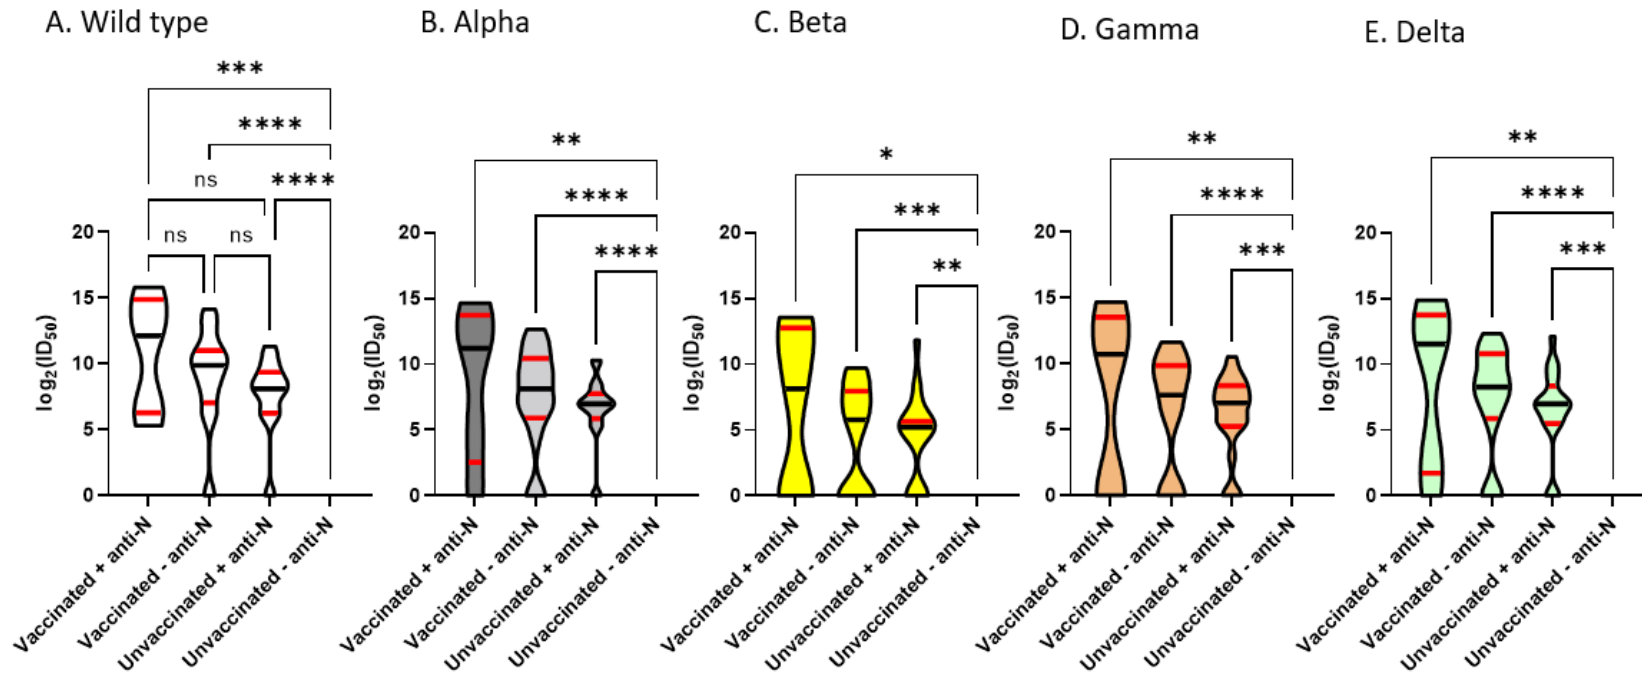

**FIG S1**

**FIG S1** Differences in neutralization of Wild type, Alpha, Beta, Gamma and Delta VLPs between vaccinated and unvaccinated groups. Data are represented as violin plots with medians (black horizontal lines), 25-percentiles (lower red horizontal lines) and 75-

percentiles (upper red horizontal lines). Truncated violin plots range from minimum to maximum data points. For panel A) Wild type and all VOC VLPs (Alpha, [panel B], Beta, [panel C], Gamma [panel D], and Delta [panel E]) a significant reduction in “unvaccinated and no anti-N” was noted when compared to “vaccinated and anti-N,” “vaccinated and no anti-N”, and “unvaccinated and anti-N” groups. \*Represents significance difference in neutralizing capacity of plasma against wild type and variant VLPs as determined by Dunn’s multiple comparisons.

### **Differences in neutralization of Wild type, Alpha, Beta, Gamma and Delta VLPs between vaccinated and unvaccinated groups**

Differences in neutralization of Wild type, Alpha, Beta, Gamma and Delta VLPs between vaccinated and unvaccinated groups were analyzed using transformed VLP neutralization ( $\log_2[\text{ID}_{50}]$ ) from Table S1. A descriptive summary of the  $\log_2(\text{ID}_{50})$  transformed neutralization data is listed in Table S2. In Fig. S1A-E, truncated violin plots range from minimum to maximum data points described in Table S2.

For Wild type VLP neutralization (Fig. S1), there was a significant difference between vaccinated and unvaccinated groups (Kruskal-Wallis test statistic 38,  $p < 0.0001$ , approximate). Neutralization of Wild-type VLPs was significantly reduced for “unvaccinated and no anti-N” when compared to; “vaccinated and anti-N” (Dunn’s multiple comparison test,  $p = 0.0004$ ), “vaccinated and no anti-N” (Dunn’s multiple comparison test,  $p < 0.0001$ ), and “unvaccinated and anti-N” (Dunn’s multiple comparison test,  $p < 0.0001$ ) (Fig. S1A).

For Alpha VLP neutralization (Fig. S1B), there was a significant difference between vaccinated and unvaccinated groups (Kruskal-Wallis test statistic 34,  $p < 0.0001$ , approximate). Neutralization of Wild-type VLPs was significantly reduced for “unvaccinated and no

anti-N” than for; “vaccinated and anti-N” (Dunn’s multiple comparison test,  $p=0.0024$ ), “vaccinated and no anti-N” (Dunn’s multiple comparison test,  $p<0.0001$ ), and “unvaccinated and anti-N” (Dunn’s multiple comparison test,  $p<0.0001$ ) (Fig. S1B).

For Beta VLP neutralization (Fig. S1C), there was a significant difference between vaccinated and unvaccinated groups (Kruskal-Wallis test statistic 21,  $p=0.0001$ , approximate). Neutralization of Beta VLPs was significantly reduced for “unvaccinated and no anti-N” than for; “vaccinated and anti-N” (Dunn’s multiple comparison test,  $p=0.015$ ), “vaccinated and no anti-N” (Dunn’s multiple comparison test,  $p=0.0008$ ), and “unvaccinated and anti-N” (Dunn’s multiple comparison test,  $p<0.0017$ ) (Fig. S1C).

For Gamma VLP neutralization (Fig. S1D), there was a significant difference between vaccinated and unvaccinated groups (Kruskal-Wallis test statistic 27,  $p<0.0001$ , approximate). Neutralization of Beta VLPs was significantly reduced for “unvaccinated and no anti-N” than for; “vaccinated and anti-N” (Dunn’s multiple comparison test,  $p=0.0095$ ), “vaccinated and no anti-N” (Dunn’s multiple comparison test,  $p<0.0001$ ), and “unvaccinated and anti-N” (Dunn’s multiple comparison test,  $p<0.0002$ ) (Fig. S1D).

For Delta VLP neutralization (Fig. S1E), there was a significant difference between vaccinated and unvaccinated groups (Kruskal-Wallis test statistic 31,  $p<0.0001$ , approximate). Neutralization of Beta VLPs was significantly reduced for “unvaccinated and no anti-N” than for; “vaccinated and anti-N” (Dunn’s multiple comparison test,  $p=0.0023$ ), “vaccinated and no anti-N” (Dunn’s multiple comparison test,  $p<0.0001$ ), and “unvaccinated and anti-N” (Dunn’s multiple comparison test,  $p<0.0002$ ) (Fig. S1E).
